# Supplementary material
Source: HighWire-hosted journal article supplement (https://jnm.snmjournals.org/highwire/filestream/94829/field_highwire_adjunct_files/0/161992_Supplemental_Data.pdf)
Supplement: 161992_Supplemental_Data.pdf [file 161992_Supplemental_Data.pdf]

**SUPPLEMENTAL TABLE 1. Original Logistic Regression Models for Pattern-based Classification Previously Derived from the North American Training Cohort (I)**

| <b>Level-I:<br/>Idiopathic Parkinson's disease</b> |                 |                       |                        |                |
|----------------------------------------------------|-----------------|-----------------------|------------------------|----------------|
| <b>Parameter</b>                                   | <b>Estimate</b> | <b>Standard Error</b> | <b>Wald Chi-square</b> | <b>P-value</b> |
| Intercept                                          | 2.7953          | 0.6819                | 16.8051                | <0.0001        |
| PDRP                                               | 1.1642          | 0.2985                | 15.2128                | <0.0001        |
| MSARP                                              | -1.4057         | 0.3562                | 15.5717                | <0.0001        |
| PSPRP                                              | -0.8382         | 0.4066                | 4.2494                 | 0.0393         |
| <b>Level-II:<br/>Multiple system atrophy</b>       |                 |                       |                        |                |
| Intercept                                          | -1.5199         | 2.5794                | 0.3472                 | 0.5557         |
| PDRP                                               | -0.2136         | 0.6180                | 0.1195                 | 0.7296         |
| MSARP                                              | 2.7217          | 1.1537                | 5.5657                 | 0.0183         |
| PSPRP                                              | -2.9390         | 0.9138                | 10.3444                | 0.0013         |
| <b>Progressive supranuclear palsy</b>              |                 |                       |                        |                |
| Intercept                                          | 1.0546          | 2.5613                | 0.1695                 | 0.6805         |
| PDRP                                               | -0.4497         | 0.4095                | 1.2056                 | 0.2722         |
| MSARP                                              | -2.6894         | 1.1133                | 5.8357                 | 0.0157         |
| PSPRP                                              | 3.0157          | 0.8505                | 12.5734                | 0.0004         |

**SUPPLEMENTAL REFERENCE**

1. Tang C, Poston K, Eckert T, et al. Differential diagnosis of parkinsonism: a metabolic imaging study using pattern analysis. *Lancet Neurol.* 2010;9:149-158.
